# Supplementary material for: Eye-specific retinogeniculate segregation proceeds normally following disruption of patterned spontaneous retinal activity
Source: PubMed Central journal article supplement (PMC4289266; doi:10.1186/1749-8104-9-25), 2014-11-07

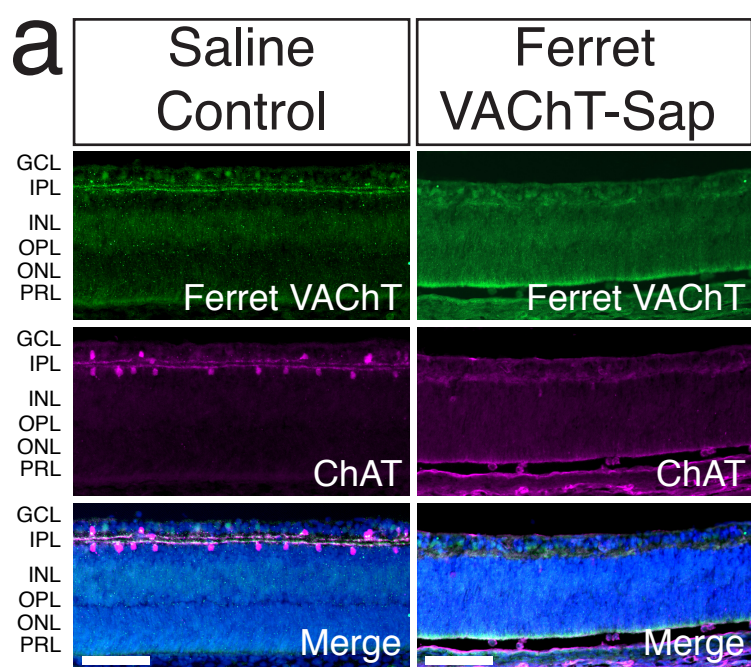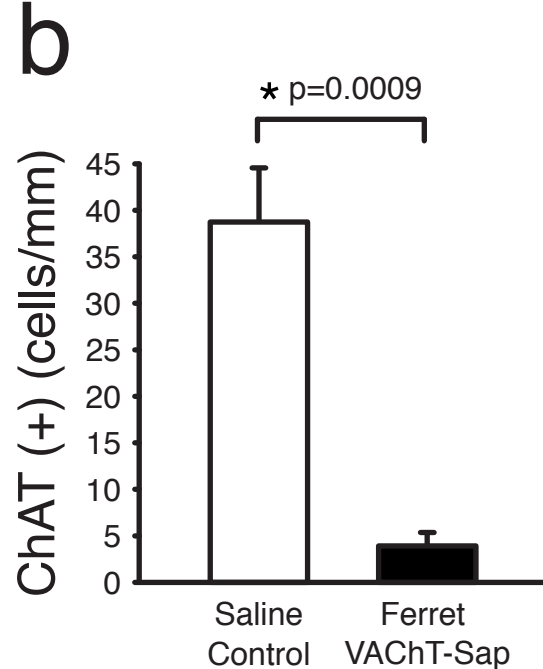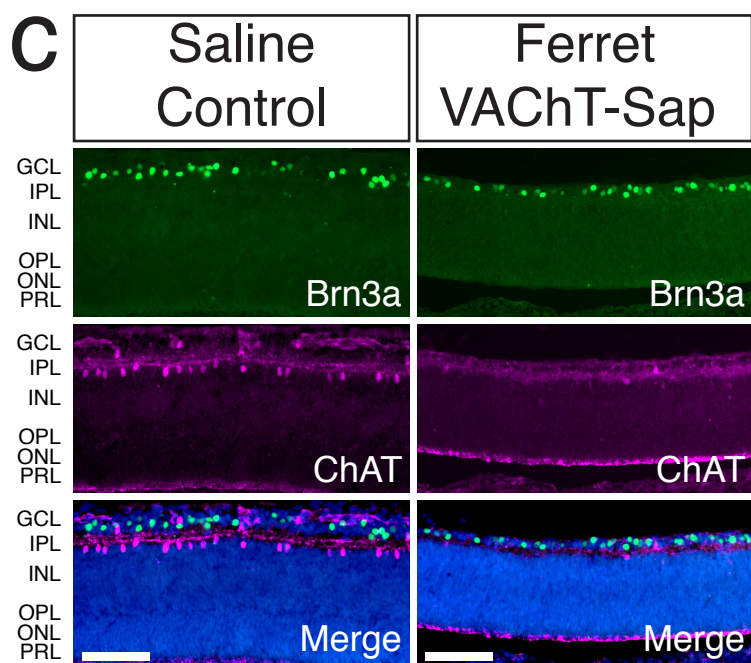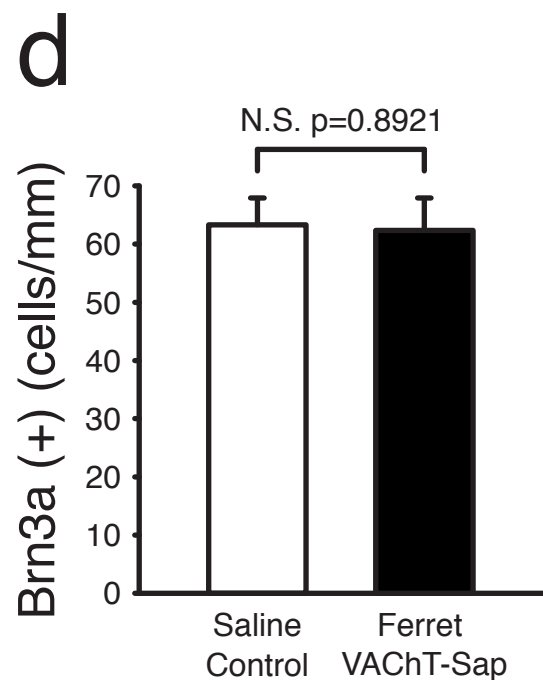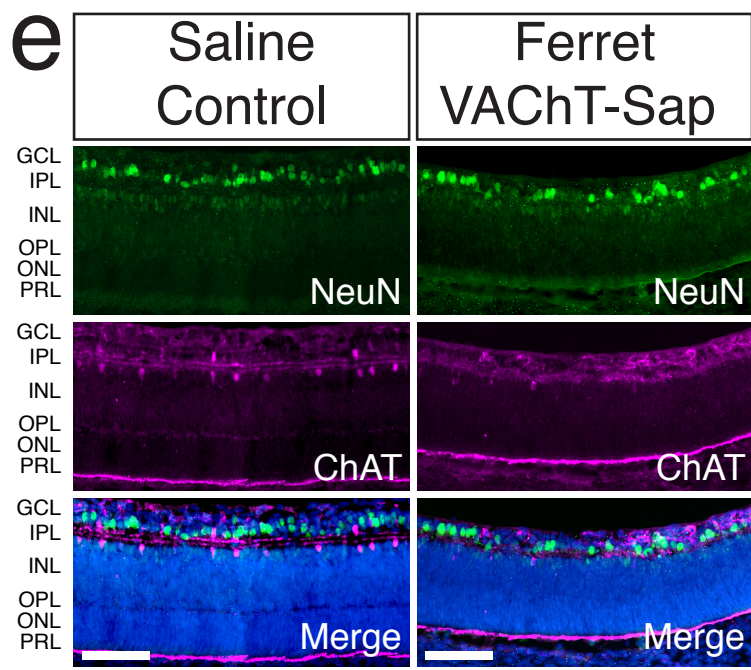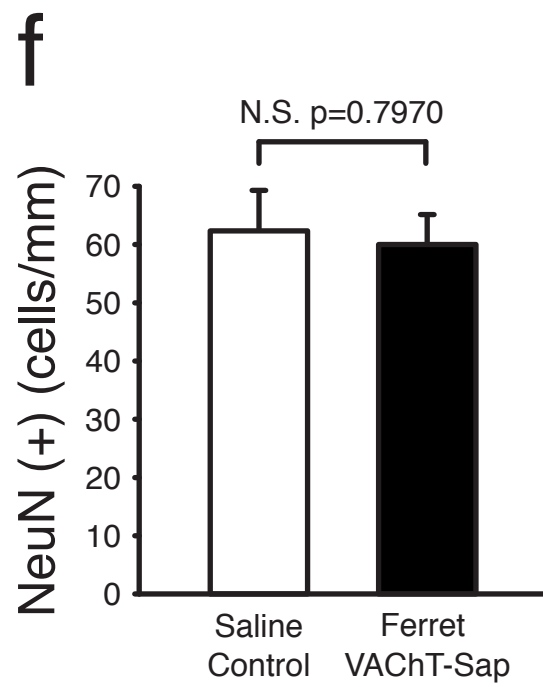

Supplement: 13064_2014_271_MOESM2_ESM.pdf [file 13064_2014_271_MOESM2_ESM.pdf]
